# Supplementary material
Source: Springer Nature journal article supplement (https://www.springermedizin.de/resource/supplementary/12874_2012_948_MOESM2_ESM.pdf/9433214)

**A**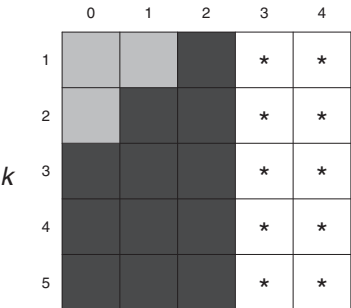**B**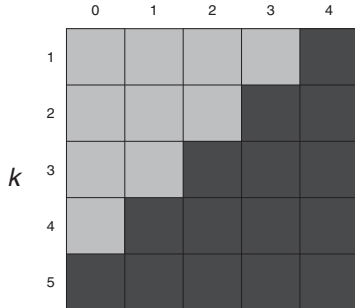**C**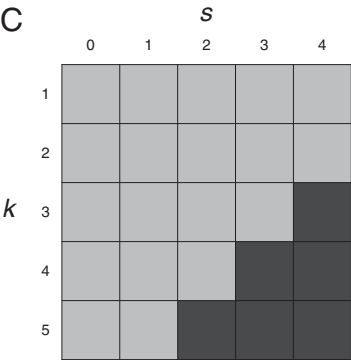**D**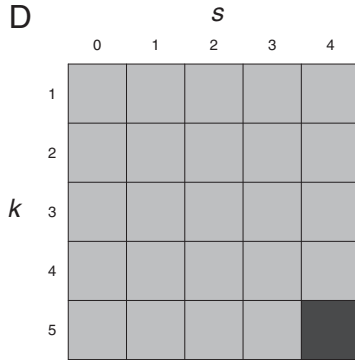

Supplement: MOESM2 [file 9433214]
